# Supplementary material for: Maximizing cancer therapy via complementary mechanisms of immune activation: PD-1 blockade, neoantigen vaccination, and Tregs depletion
Source: PubMed Central journal article supplement — J Immunother Cancer. 2021 Nov 25;9(11):e003480. doi: 10.1136/jitc-2021-003480 (PMC8627409; doi:10.1136/jitc-2021-003480), 2021-11-25
Supplement: jitc-2021-003480supp002.pdf [file jitc-2021-003480supp002.pdf]

**Supplementary Figure 1. High enrichment in the number of DEG genes modulated by the triple combination GAd/anti-PD-1/BEMPEG.** (A) Number of differentially expressed genes (DEG) detected by comparing responder mice for each group of treatment versus untreated (n=3–5/group) (median log<sub>2</sub> FC <-1 or >1; Benjamini–Hochberg corrected p-value < 0.05). (B-C) Venn diagrams reporting the number of DEG shared between the different treatments.
