# Supplementary figures and images for: Maximizing cancer therapy via complementary mechanisms of immune activation: PD-1 blockade, neoantigen vaccination, and Tregs depletion
Source: PubMed Central journal article supplement — J Immunother Cancer. 2021 Nov 25;9(11):e003480. doi: 10.1136/jitc-2021-003480 (PMC8627409; doi:10.1136/jitc-2021-003480), 2021-11-25

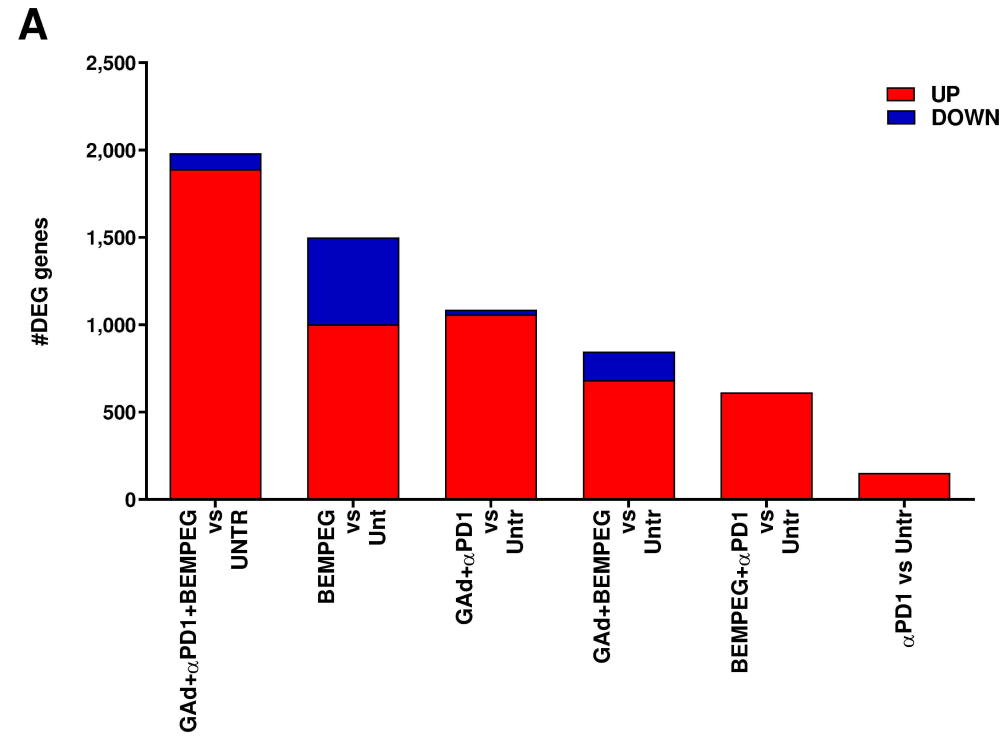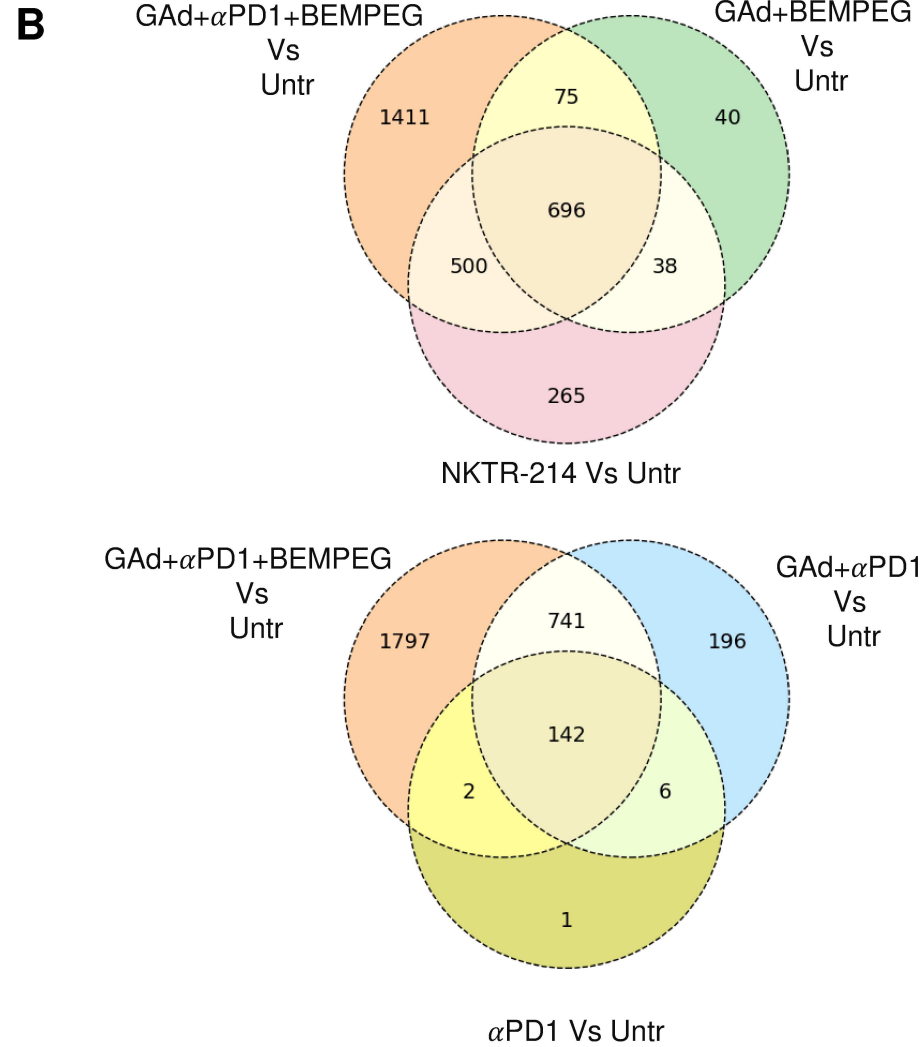

Supplement: jitc-2021-003480supp001.pdf [file jitc-2021-003480supp001.pdf]
